# Supplementary material for: TGF-βRII Knock-down in Pancreatic Cancer Cells Promotes Tumor Growth and Gemcitabine Resistance. Importance of STAT3 Phosphorylation on S727
Source: Cancers (Basel). 2018 Jul 31;10(8):254. doi: 10.3390/cancers10080254 (PMC6116183; doi:10.3390/cancers10080254)
Supplement: Supplementary file 1 [file cancers-10-00254-s001.pdf]

# TGF- $\beta$ RII Knock-Down in Pancreatic Cancer Cells Promotes Tumor Growth and Gemcitabine Resistance. Importance of STAT3 Phosphorylation on S727

Vincent Drubay, Nicolas Skrypek, Lucie Cordiez, Romain Vasseur, Céline Schulz, Nihad Boukrout, Belinda Duchêne, Lucie Coppin, Isabelle Van Seuningen and Nicolas Jonckheere

## Supplementary Material

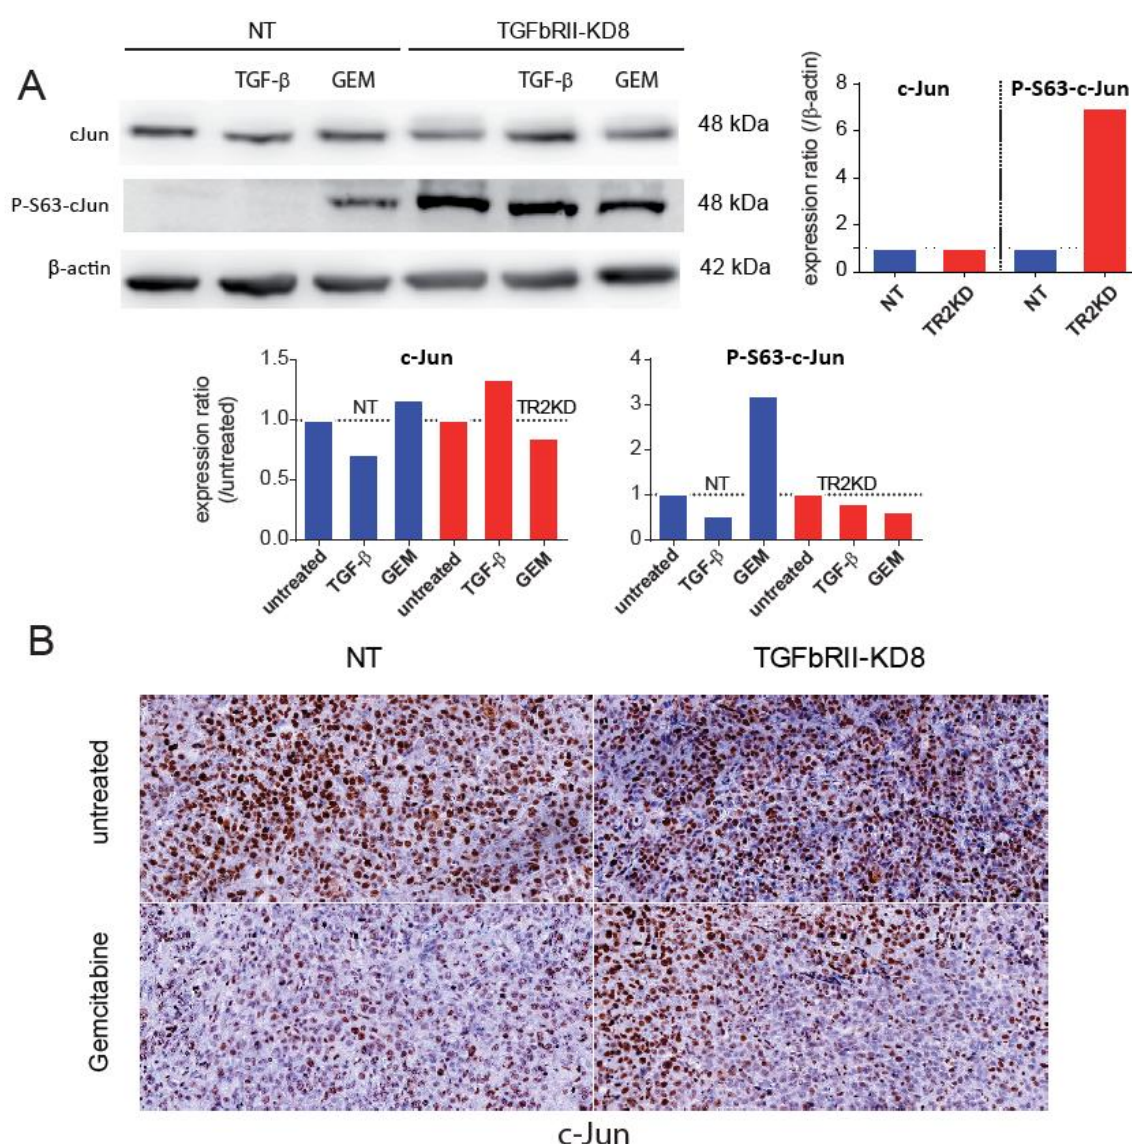

Figure S1. Cont.

C

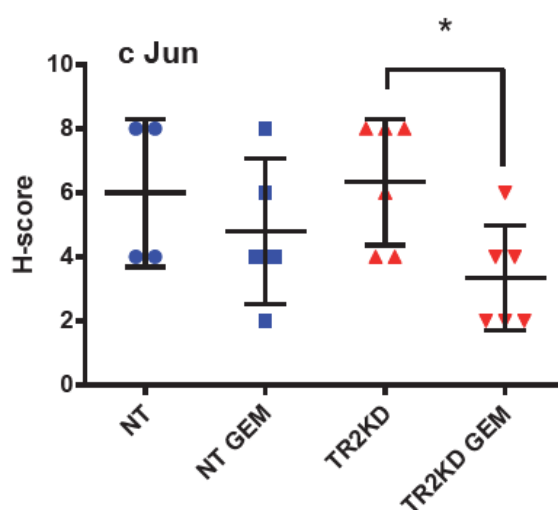

**Figure S1.** TGF- $\beta$ RII knockdown promotes c-Jun S-63 phosphorylation in CAPAN-2 cells. (A) c-Jun, phospho-S63 c-Jun and  $\beta$ -actin expression was analyzed by western blotting. Bands intensities were quantified by densitometry and ratios (KD vs. NT or treated/untreated) are indicated in the graphs. Expression in NT (for TGF- $\beta$ RIIKD) or untreated (for gemcitabine/TGF- $\beta$ ) cells was arbitrarily set to 1. (B) IHC analysis of c-Jun on extracted xenografted NT and TGF- $\beta$ RIIKD tumors. (C) IHC staining was scored in NT and TGF- $\beta$ RIIKD xenografted tumors that were treated with gemcitabine or PBS. \*  $p < 0.05$  indicate statistical significance of TGF- $\beta$ RII-KD compared with the NT control.

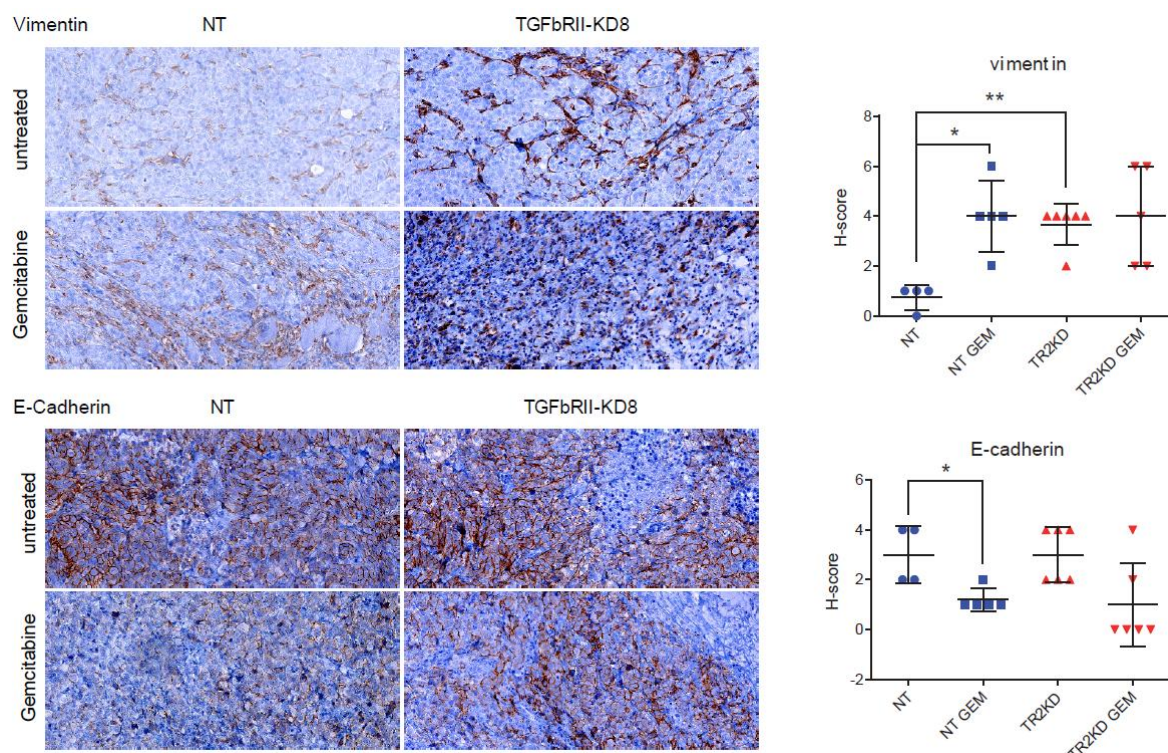

**Figure S2.** TGF- $\beta$ RII knockdown promotes partial EMT-like phenotype. IHC analysis of E-cadherin and vimentin on extracted xenografted NT and TGF- $\beta$ RIIKD tumors. IHC staining was scored in NT and TGF- $\beta$ RIIKD xenografted tumors that were treated with gemcitabine or PBS. \* $p < 0.05$ , \*\* $p < 0.01$  indicate statistical significance of TGF- $\beta$ RII-KD compared with the NT control.
